# Supplementary material for: Health seeking behavior among individuals presenting with chronic cough at referral hospitals in Uganda; Missed opportunity for early tuberculosis diagnosis
Source: PubMed Central journal article supplement (PMC6553765; doi:10.1371/journal.pone.0217900), 2019-06-06
Supplement: pone.0217900.s002.pdf [file pone.0217900.s002.pdf]

**THE EAST AFRICAN PUBLIC HEALTH LABORATORY NETWORKING (EAPHLN) PROJECT**  
**Operations Research Component**  
**EVALUATION OF IMPACT OF NEW TUBERCULOSIS DIAGNOSTICS SCALE-UP ON**  
**TUBERCULOSIS DIAGNOSIS AND OUTCOMES**

Study Identification Number

Hospital Registration Number

Patient Initials

| SOCIO-DEMOGRAPHIC                                                                                                                                                                                                                                                                                                                                                                  |                                                                                                                                                                                          |                                                                                                                                                                                                                                                                                                                               |                                                                                                                                                                |
|------------------------------------------------------------------------------------------------------------------------------------------------------------------------------------------------------------------------------------------------------------------------------------------------------------------------------------------------------------------------------------|------------------------------------------------------------------------------------------------------------------------------------------------------------------------------------------|-------------------------------------------------------------------------------------------------------------------------------------------------------------------------------------------------------------------------------------------------------------------------------------------------------------------------------|----------------------------------------------------------------------------------------------------------------------------------------------------------------|
| <b>1. Study Site</b><br><i>(circle one)</i><br>1. Mbale<br>2. Arua<br>3. Mbarara<br>4. Gulu<br>5. Mulago                                                                                                                                                                                                                                                                           | <b>2. Which department is the client coming from</b> <i>(circle one)</i><br>1. OPD<br>2. Self-referral<br>3. Inpatient<br>4. Special clinic e.g. HIV Clinic, Diabetes clinic<br>5. Other | <b>3. Marital Status</b><br><i>(circle one)</i><br>1. Single<br>2. Married<br>3. Separated<br>4. Divorced<br>5. Widowed<br>6. Other                                                                                                                                                                                           | <b>4. DATE:</b> ___/___/___ (dd/mm/yyyy)<br><br><b>5. Age:</b> _____<br><br><b>6. Sex:</b> 1. Male <input type="checkbox"/> 2. Female <input type="checkbox"/> |
| 7. Residence <i>(circle one)</i> 1. Urban    2. Rural<br>8. Is this your home or you are visiting because of treatment? <i>(circle one)</i> 1. Home    2. Visiting for treatment<br>9. Village _____    10. Parish: _____<br><br>11. Sub county _____    12. District _____    13. Phone Contact: _____<br>14. Approximate distance from home to this health facility in Kms _____ |                                                                                                                                                                                          |                                                                                                                                                                                                                                                                                                                               |                                                                                                                                                                |
| 15. Is this your nearest health facility?    1. Yes    2. No<br>16. If No, why did you decide to come to this health facility<br>1. Referred by a health worker <input type="checkbox"/><br>2. No TB diagnosis at the nearest health facility <input type="checkbox"/><br>3. Other _____                                                                                           |                                                                                                                                                                                          | 17. Were you referred to this health facility? 1. Yes    2. No<br>18. If yes, which facility referred you?<br>1. Government hospital <input type="checkbox"/><br>2. Private clinic <input type="checkbox"/><br>3. Drug store/Pharmacy <input type="checkbox"/><br>4. Health Centre <input type="checkbox"/><br>5. Other _____ |                                                                                                                                                                |

**RISK FACTORS**

|                                                                                                                                                                                                                                                                                                                                                                            |                                                                                                                                                                                                                                                                                                                                                                                                                                                                              |
|----------------------------------------------------------------------------------------------------------------------------------------------------------------------------------------------------------------------------------------------------------------------------------------------------------------------------------------------------------------------------|------------------------------------------------------------------------------------------------------------------------------------------------------------------------------------------------------------------------------------------------------------------------------------------------------------------------------------------------------------------------------------------------------------------------------------------------------------------------------|
| 19. Are you exposed to biomass smoke (charcoal, wood, industrial etc)? 1. Yes    2. No<br>20. Yes, state hours of exposure per day _____<br><br>21. Occupation <i>(circle one)</i><br>1. Unemployed<br>2. Housewife<br>3. Peasant farmer<br>4. Market vendor<br>5. Builder<br>6. Health Worker<br>7. Business<br>8. Civil servant<br>9. Farmer<br>10. Other. Specify _____ | 22. Highest level of Education <i>(circle one)</i><br>1. None<br>2. Incomplete primary<br>3. Complete primary<br>4. Incomplete secondary<br>5. Complete secondary<br>6. Tertiary<br><br>23. Average daily income _____<br>24. Do you have a family member who has or has ever had TB? 1. Yes    2. No<br>25. Do you know anyone who has TB?    1. Yes    2. No<br>26. If Yes, how many _____<br>27. Do you share a bedroom with someone who is not your spouse? 1. Yes 2. No |
|----------------------------------------------------------------------------------------------------------------------------------------------------------------------------------------------------------------------------------------------------------------------------------------------------------------------------------------------------------------------------|------------------------------------------------------------------------------------------------------------------------------------------------------------------------------------------------------------------------------------------------------------------------------------------------------------------------------------------------------------------------------------------------------------------------------------------------------------------------------|

**PAST MEDICAL HISTORY**

|                                                                                                                                                                                                                                                                                                                                                                                                                                                                                                                                                                                                                                                                                                                                                                                                                                                                                          |                                                                                                                                                                                                                                                                                                                                                                                                                                                                                                                                                                                                                                                                                                                                                                                                                |
|------------------------------------------------------------------------------------------------------------------------------------------------------------------------------------------------------------------------------------------------------------------------------------------------------------------------------------------------------------------------------------------------------------------------------------------------------------------------------------------------------------------------------------------------------------------------------------------------------------------------------------------------------------------------------------------------------------------------------------------------------------------------------------------------------------------------------------------------------------------------------------------|----------------------------------------------------------------------------------------------------------------------------------------------------------------------------------------------------------------------------------------------------------------------------------------------------------------------------------------------------------------------------------------------------------------------------------------------------------------------------------------------------------------------------------------------------------------------------------------------------------------------------------------------------------------------------------------------------------------------------------------------------------------------------------------------------------------|
| <p>28. In the past 12 months, is there any member of your household who was diagnosed with TB? <i>(Circle one)</i></p> <p>1. Yes            2. No</p> <p>29. Do you smoke tobacco? <i>(Circle one)</i></p> <p>1. Yes            2. No            3. Unknown</p> <p>30. If Yes, how often</p> <p>1. Daily          2. Less than daily (not every day)</p> <p>3. Unknown</p> <p>31. Duration of smoking (current and past in years)</p> <p>_____</p> <p>32. Number of tobacco pieces/sticks smoked per day _____</p> <p>33. Do you drink alcohol?    1. Yes 2. No<br/><i>(if yes answer questions 34-37)</i></p> <p>34. If Yes, how often?</p> <p>1. Daily</p> <p>2. Less than daily (not every day)</p> <p>3. Unknown</p> <p>35. Duration of alcohol consumption (current and past in years) _____</p> <p>36. How many drinks per day _____</p> <p>37. How many drinks per week _____</p> | <p>38. History of Diabetes <i>(Circle one)</i>    1. Yes            2. No</p> <p>39. RBS (mmol/l) _____</p> <p>40. History of Cancer    1. Yes            2. No</p> <p>41. Have you been previously treated for TB? [Probe for long respiratory illness, TB symptoms, long courses of treatments including injections of more than a month and chest x-rays to help patient remember] <i>(Circle one)</i></p> <p>1. Yes          2. No</p> <p>42. If Yes</p> <p>a) When were you treated? _____<br/>(state the year of treatment)</p> <p>b) How many times have you been treated?<br/>_____ (times)</p> <p>c) Outcome of the last treatment according to the patient <i>(circle one that applies)</i></p> <p>1. Cured</p> <p>2. Failed</p> <p>3. Defaulted</p> <p>4. Treatment completed</p> <p>5. Unknown</p> |
|------------------------------------------------------------------------------------------------------------------------------------------------------------------------------------------------------------------------------------------------------------------------------------------------------------------------------------------------------------------------------------------------------------------------------------------------------------------------------------------------------------------------------------------------------------------------------------------------------------------------------------------------------------------------------------------------------------------------------------------------------------------------------------------------------------------------------------------------------------------------------------------|----------------------------------------------------------------------------------------------------------------------------------------------------------------------------------------------------------------------------------------------------------------------------------------------------------------------------------------------------------------------------------------------------------------------------------------------------------------------------------------------------------------------------------------------------------------------------------------------------------------------------------------------------------------------------------------------------------------------------------------------------------------------------------------------------------------|

**KNOWLEDGE ON TB**

|                                                                                                                                                                                                                                                                                                                                                                                                                         |                                                                                                                                                                                                                                                                                                                                                                                                                                                                                           |
|-------------------------------------------------------------------------------------------------------------------------------------------------------------------------------------------------------------------------------------------------------------------------------------------------------------------------------------------------------------------------------------------------------------------------|-------------------------------------------------------------------------------------------------------------------------------------------------------------------------------------------------------------------------------------------------------------------------------------------------------------------------------------------------------------------------------------------------------------------------------------------------------------------------------------------|
| <p>43. Did you ever think that the cough you have could be TB? <i>(Circle one)</i>    1. Yes    2.No</p> <p>44. If Yes; how did you know?<i>(Circle one)</i></p> <p>1. Relative</p> <p>2. Health worker</p> <p>3. Friend</p> <p>4. Media (Radio, TV, Newspaper etc)</p> <p>45. Before today, did you know there is a laboratory test available for diagnosis of TB?<i>(Circle one)</i></p> <p>1. Yes          2. No</p> | <p>46. If yes, which of these did you hear about?<i>(Circle one)</i></p> <p>1. Microscopy</p> <p>2. Culture</p> <p>3. GeneXpert</p> <p>47. Do you know how TB is spread?<i>(Circle one)</i></p> <p>1.Yes          2.No          3.Don't know</p> <p>48. If Yes, how?<i>(Circle one)</i></p> <p>1. Cough</p> <p>2. Contact</p> <p>3. Sharing utensils</p> <p>4. Other _____</p> <p>49. Do you think TB is curable?<i>(Circle one)</i></p> <p>1.Yes          2.No          3.Don't know</p> |
|-------------------------------------------------------------------------------------------------------------------------------------------------------------------------------------------------------------------------------------------------------------------------------------------------------------------------------------------------------------------------------------------------------------------------|-------------------------------------------------------------------------------------------------------------------------------------------------------------------------------------------------------------------------------------------------------------------------------------------------------------------------------------------------------------------------------------------------------------------------------------------------------------------------------------------|

**CLINICAL DATA**

| 50. Weight _____ (kgs)     | 51. Height _____ (cm)           | 52. BCG Scar | 1. Present | 2. Absent |
|----------------------------|---------------------------------|--------------|------------|-----------|
| SYMPTOMS                   |                                 |              |            |           |
| Symptom                    | Duration in days                |              |            |           |
| 53. Chronic cough          | 1. Yes <input type="checkbox"/> |              |            | 2. No     |
| 54. Fever                  | 1. Yes <input type="checkbox"/> |              |            | 2. No     |
| 55. Weight loss            | 1. Yes <input type="checkbox"/> |              |            | 2. No     |
| 56. Excessive Night sweats | 1. Yes <input type="checkbox"/> |              |            | 2. No     |
| 57. Dyspnea                | 1. Yes <input type="checkbox"/> |              |            | 2. No     |
| 58. Chest Pain             | 1. Yes <input type="checkbox"/> |              |            | 2. No     |
| 59. Blood stained sputum   | 1. Yes <input type="checkbox"/> |              |            | 2. No     |
| 60. Other Specify<br>_____ | <input type="checkbox"/>        |              |            |           |

### HIV STATUS

|                                                      |                 |                 |                                  |
|------------------------------------------------------|-----------------|-----------------|----------------------------------|
| 61. Do you know your HIV status?                     | 1. Yes          | 2. No           | <i>(if no, go to question 5)</i> |
| 62. If yes, what is your HIV status?                 | 1. HIV positive | 2. HIV Negative |                                  |
| 63. If no send for HIV test and record results       | 1. HIV positive | 2. HIV Negative |                                  |
| 64. If HIV positive are you on antiretroviral drugs? | 1. Yes          | 2. No           |                                  |
| 65. If yes, duration in months _____                 |                 |                 |                                  |

### BEHAVIOUR REGARDING COUGH

|                                                                                               |                                                                         |
|-----------------------------------------------------------------------------------------------|-------------------------------------------------------------------------|
| 66. <b>Did you seek medical care for your chronic cough?</b> <i>(Circle one)</i> 1. Yes 2. No |                                                                         |
| 67. If Yes (a) <b>Where did you first seek care?</b> <i>(Circle)</i>                          | (b) <b>What service did you receive?</b> <i>(Circle all that apply)</i> |
| 1. Public health facility                                                                     | 1. Given medicine                                                       |
| 2. NGO facility                                                                               | 2. Chest Xray                                                           |
| 3. Private health facility                                                                    | 3. Asked to provide sputum                                              |
| 4. Drug store/Pharmacy                                                                        | 4. Referred elsewhere for care                                          |
| 5. Herbalist                                                                                  | 5. Physical exam/Consultation                                           |
| 6. Other _____                                                                                | 6. Other _____                                                          |
| 68. <b>If no, what is the main reason for not seeking care?</b> <i>(Circle)</i>               | 7. My church/mosque leader stopped me                                   |
| 1. Self-treatment                                                                             | 8. I was using herbs                                                    |
| 2. Didn't think it was a serious illness                                                      | 9. I was undergoing spiritual treatment by a traditional healer         |
| 3. Ignore                                                                                     | 10. I feared that my friends/relative would know I have TB (stigma)     |
| 4. Cost                                                                                       | 11. Other _____                                                         |
| 5. Distance                                                                                   |                                                                         |
| 6. Long waiting time                                                                          |                                                                         |

### DELAYS

**69. Indicate period in days taken for each of the following;**

70. Time taken before client presented to any health care facility after the onset of symptoms

.....

71. Time between presentation to this diagnostic health facility (study site) and sputum specimen submission.

.....

72. Time taken from sputum submission to issuing of results

.....

73. Time taken before initiation of treatment after the results were issued .....

.....

**ACTIONS**

74. Sputum sample collected (*Circle*)                      1. Yes                      2. No

75. If no reason \_\_\_\_\_

76. Sputum shipped to central Lab (*Circle*)                      1. Yes                      2. No

77. If no reason \_\_\_\_\_

78. Sample sent to central lab                                      1. Spot                      2. Early morning

79. Sample on which microscopy and GeneXpert were done

**Microscopy** (*Circle*)

**GeneXpert** (*Circle*)

1. Spot    2. Early morning

1. Spot    2. Early morning

**LABORATORY RESULTS (FROM SITE)**

80. FM microscopy (*Circle*)

- 1. No AFBs seen
- 2. Positive 1+
- 3. Positive 2+
- 4. Positive 3+
- 5. Positive 4 AFBs/100 fields

81. GeneXpert (*Circle*)

- 1. MTB not detected
- 2. MTB detected very low
- 3. MTB detected low
- 4. MTB detected medium
- 5. MTB detected high
- 6. MTB detected Rif Resistance

*Responsible Officer:* .....

*Date:*.....

*Sign:*.....
